# Supplementary material for: Integrative genomics and transcriptomics analysis of human embryonic and induced pluripotent stem cells
Source: PubMed Central journal article supplement (PMC4298950; doi:10.1186/s13040-014-0032-2), 2014-12-13

A)

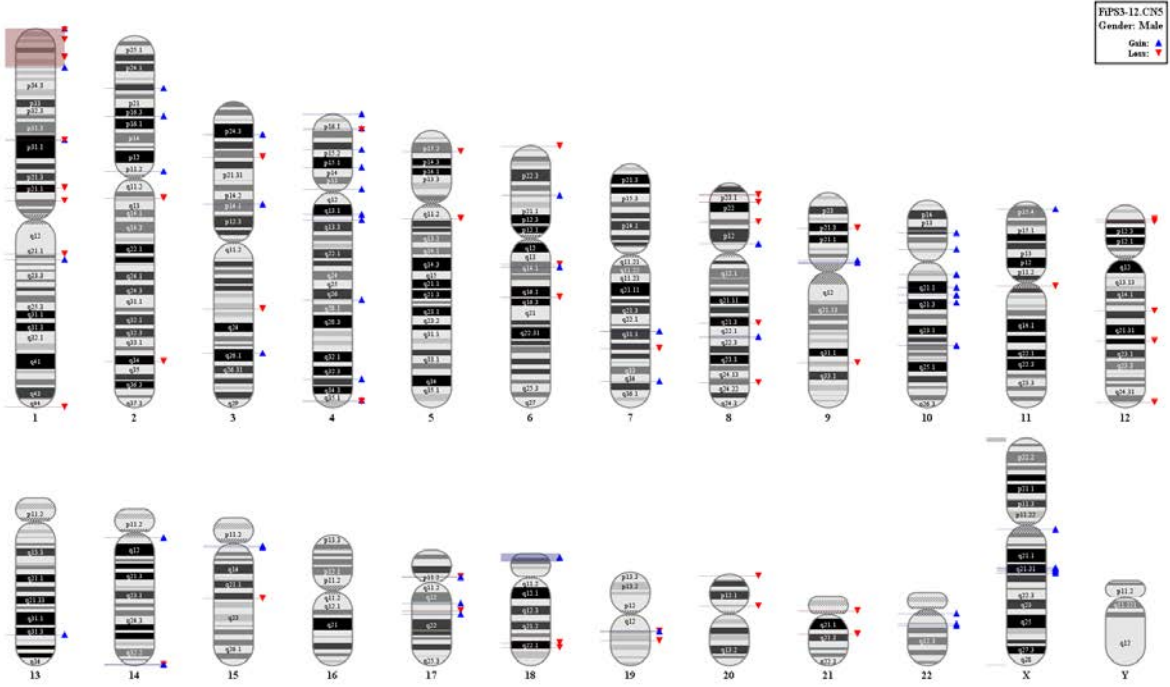

B)

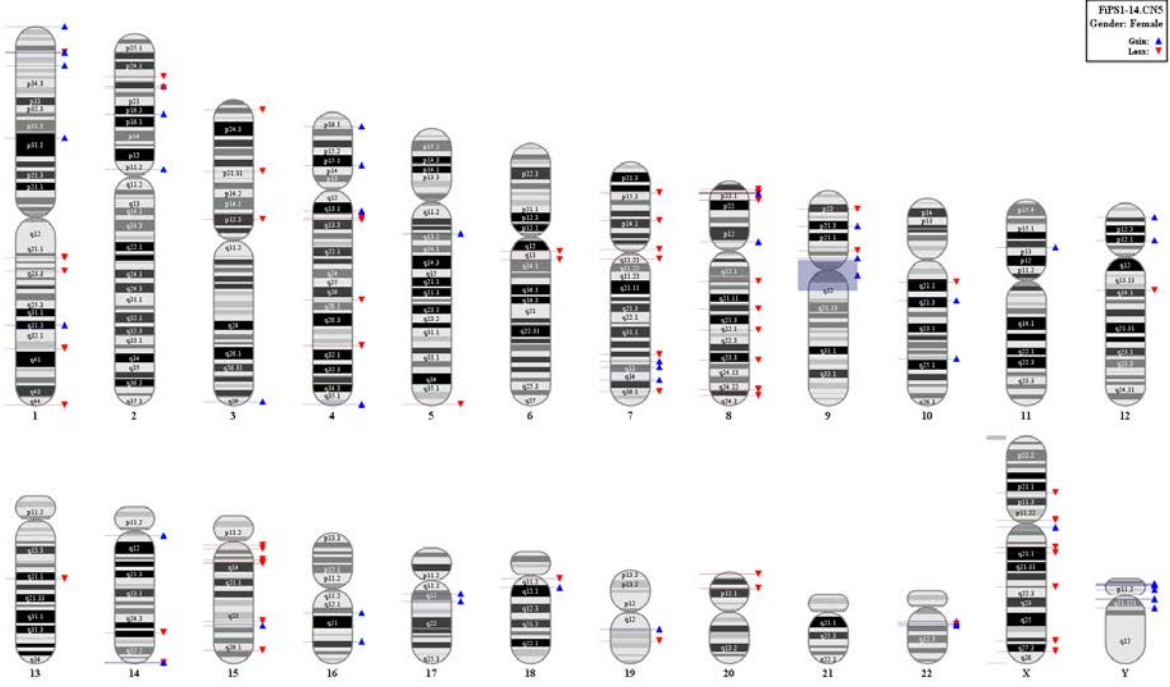

Supplement: 13040_2014_32_MOESM2_ESM.pdf [file 13040_2014_32_MOESM2_ESM.pdf]
