# Supplementary material for: Integrative genomics and transcriptomics analysis of human embryonic and induced pluripotent stem cells
Source: PubMed Central journal article supplement (PMC4298950; doi:10.1186/s13040-014-0032-2), 2014-12-13
Supplement: 13040_2014_32_MOESM6_ESM.pdf [file 13040_2014_32_MOESM6_ESM.pdf]

**Supplementary table 4: Changes in transcription factor binding scores. BSD=binding score difference, max BS= maximum possible binding score, (h)=hESC, (l)=long interval for SNPs, (s)=short interval for SNPs**

| SNP           | alleles | Ensembl code     | gene      | association | Transfac TF                 | score of allele A | score of allele B | BSD   | max BS |
|---------------|---------|------------------|-----------|-------------|-----------------------------|-------------------|-------------------|-------|--------|
| SNP_A-8646384 | C/T     | ENSG00000144668  | ITGA9     | gene(h)     | V_CREB1CJUN.01 (ATF2/c-Jun) | 21947             | 109               | 21838 | 21947  |
| SNP_A-1830368 | A/G     | ENSE000001169516 | APBB2     | exon (l)    | V_LMO2COM.02 (Lmo2complex)  | 4784              | 52                | 4732  | 5251   |
| SNP_A-1988240 | A/G     | ENSE00000765449  | TFB1M     | exon (l)    | V_GATA1.06 (GATA-1)         | 33160             | 177               | 32983 | 33160  |
| SNP_A-4288522 | A/G     | ENSG00000144668  | ITGA9     | gene (h)    | V_HEB_Q6 (HEB)              | 21095             | 174               | 20921 | 21095  |
| SNP_A-1939907 | A/C     | ENSG00000158258  | CLSTN2    | gene (h)    | V_OSF2_Q6 (Osf2)            | 11297             | 56                | 11241 | 11297  |
| SNP_A-2303118 | A/G     | ENSE000001443673 | TFB1M     | exon (l)    | V_OSF2_Q6 (Osf2)            | 11297             | 1961              | 9337  | 11297  |
| SNP_A-8453065 | A/T     | ENSE000001021726 | CDH18     | exon (l)    | V_HMGY_Q6 (HMGY)            | 14                | 1849              | -1835 | 2214   |
| SNP_A-8512399 | G/T     | ENSG00000158258  | CLSTN2    | gene (h)    | V_HMGY_Q6 (HMGY)            | 2214              | 12                | 2202  | 2214   |
| SNP_A-8613122 | A/C     | ENSG00000149972  | CNTN5     | gene (h)    | V_HMGY_Q6 (HMGY)            | 1849              | 9                 | 1839  | 2214   |
| SNP_A-1830368 | A/G     | ENSE000001169516 | APBB2     | exon (l)    | V_GATA_Q6 (GATA)            | 1485              | 250               | 1235  | 1485   |
| SNP_A-1988240 | A/G     | ENSE00000765449  | TFB1M     | exon (l)    | V_GATA_Q6 (GATA)            | 1485              | 59                | 1426  | 1485   |
| SNP_A-2218269 | C/G     | ENSE000001008804 | ACOXL     | exon (l)    | V_MYC_Q2 (Myc)              | 3995              | 20                | 3975  | 3995   |
|               |         | ENSE000001146532 | ACOXL     | exon (l)    |                             |                   |                   |       |        |
| SNP_A-2296358 | C/T     | ENSE000001217678 | AFF3      | exon (l)    | V_MYC_Q2 (Myc)              | 3995              | 20                | 3975  | 3995   |
| SNP_A-8406487 | C/G     | ENSG00000119537  | KDSR      | gene (h)    | V_CREB_Q3 (CREB)            | 793               | 62                | 731   | 891    |
| SNP_A-8618328 | A/C     | ENSG00000175928  | LRRN1     | gene (h)    | V_LEF1_Q2 (LEF1)            | 2069              | 10                | 2059  | 2069   |
| SNP_A-4288522 | A/G     | ENSG00000144668  | ITGA9     | gene (h)    | V_LAP4_Q6.01 (AP-4)         | 9233              | 64                | 9169  | 9233   |
| SNP_A-8672281 | A/T     | ENSE00000780527  | FND3B     | exon (l)    | V_HNF4_Q6.02 (HNF4)         | 498               | 3                 | 495   | 498    |
|               |         | ENSE00000968103  | FND3B     | exon (l)    |                             |                   |                   |       |        |
|               |         | ENSE00001291680  | FND3B     | exon (l)    |                             |                   |                   |       |        |
|               |         | ENSE00001298842  | FND3B     | exon (l)    |                             |                   |                   |       |        |
|               |         | ENSE00000780525  | FND3B     | exon (l)    |                             |                   |                   |       |        |
|               |         | ENSE00000780526  | FND3B     | exon (l)    |                             |                   |                   |       |        |
| SNP_A-4283012 | A/G     | ENSG00000174332  | GLIS1     | gene (h)    | V_HOXA7.01 (HOXA7)          | 4949              | 25                | 4924  | 5552   |
| SNP_A-2218269 | C/G     | ENSE000001008804 | ACOXL     | exon (l)    | V_CLOCKBMAL_Q6 (CLOCK;BMAL) | 14698             | 73                | 14625 | 14698  |
|               |         | ENSE000001146532 | ACOXL     | exon (l)    |                             |                   |                   |       |        |
| SNP_A-2165062 | C/T     | ENSG00000171631  | P2RY6     | gene (h)    | V_KID3.01 (Kid3)            | 360               | 2                 | 358   | 360    |
| SNP_A-4279956 | C/T     | ENSG000001436130 | PCNXL2    | exon (l)    | V_KID3.01 (Kid3)            | 360               | 2                 | 358   | 360    |
|               |         | ENSE000001435333 | PCNXL2    | exon (l)    |                             |                   |                   |       |        |
| SNP_A-4282973 | C/T     | ENSE000001021726 | CDH18     | exon (l)    | V_KID3.01 (Kid3)            | 360               | 2                 | 358   | 360    |
| SNP_A-8299044 | C/T     | ENSG00000158258  | CLSTN2    | gene (h)    | V_KID3.01 (Kid3)            | 360               | 2                 | 358   | 360    |
| SNP_A-8303622 | C/T     | ENSE000001157163 | KCNAB1    | exon (l)    | V_KID3.01 (Kid3)            | 360               | 2                 | 358   | 360    |
| SNP_A-8361400 | C/T     | ENSG00000164318  | EGFLAM    | gene (h)    | V_KID3.01 (Kid3)            | 360               | 2                 | 358   | 360    |
| SNP_A-8362388 | C/G     | ENSE000001220387 | LEPREL1   | exon (l)    | V_KID3.01 (Kid3)            | 360               | 2                 | 358   | 360    |
|               |         | ENSE000001220387 | LEPREL1   | exon (s)    |                             |                   |                   |       |        |
| SNP_A-8365058 | C/T     | ENSE000001531459 | COL6A5    | exon (l)    | V_KID3.01 (Kid3)            | 360               | 2                 | 358   | 360    |
| SNP_A-8402354 | C/T     | ENSG00000131781  | FMO5      | gene (h)    | V_KID3.01 (Kid3)            | 360               | 2                 | 358   | 360    |
| SNP_A-8677910 | C/T     | ENSE000001157163 | KCNAB1    | exon (l)    | V_KID3.01 (Kid3)            | 360               | 2                 | 358   | 360    |
|               |         | ENSE000001157163 | KCNAB1    | exon (s)    |                             |                   |                   |       |        |
| SNP_A-8692395 | C/G     | ENSE000001497139 | LAMA1     | exon (l)    | V_KID3.01 (Kid3)            | 360               | 2                 | 358   | 360    |
| SNP_A-8552484 | A/G     | ENSE000001124309 | UST       | exon (l)    | V_PARP_Q3 (PARP)            | 8668              | 43                | 8625  | 8668   |
| SNP_A-2129437 | A/G     | ENSE000001455839 | NRD1      | exon (l)    | V_ZNF333.01 (ZNF333)        | 951               | 5                 | 946   | 951    |
|               |         | ENSE000001030729 | NRD1      | exon (l)    |                             |                   |                   |       |        |
| SNP_A-8591611 | A/G     | ENSG00000144331  | ZNF385B   | gene (h)    | V_ZNF333.01 (ZNF333)        | 951               | 5                 | 946   | 951    |
| SNP_A-1921773 | A/G     | ENSG00000174332  | GLIS1     | gene (h)    | V_ELF1_Q5 (ELF1)            | 2322              | 12                | 2310  | 2322   |
| SNP_A-2044682 | A/G     | ENSG00000205629  | LCMT1     | gene (h)    | V_ELF1_Q5 (ELF1)            | 2322              | 12                | 2310  | 2322   |
| SNP_A-2182766 | G/T     | ENSE000001479582 | NRCAM     | exon (l)    | V_ELF1_Q5 (ELF1)            | 2322              | 15                | 2307  | 2322   |
| SNP_A-2265109 | A/G     | ENSE00000874857  | WDR59     | exon (l)    | V_ELF1_Q5 (ELF1)            | 2322              | 12                | 2310  | 2322   |
| SNP_A-8497366 | A/C     | ENSG00000158258  | CLSTN2    | gene (h)    | V_ELF1_Q5 (ELF1)            | 2322              | 12                | 2310  | 2322   |
| SNP_A-2088972 | C/T     | ENSE000001436130 | PCNXL2    | exon (l)    | V_IPF1_Q6 (IPF1)            | 1046              | 201               | 845   | 1046   |
|               |         | ENSE000001435333 | PCNXL2_16 | exon (l)    |                             |                   |                   |       |        |
| SNP_A-8705838 | C/T     | ENSE00000759874  | MAN2A1    | exon (l)    | V_IPF1_Q6 (IPF1)            | 1046              | 201               | 845   | 1046   |
| SNP_A-1884247 | A/G     | ENSE00000739600  | NRCAM     | exon (l)    | V_NFAT1_Q6 (NFAT1)          | 1764              | 65                | 1699  | 1764   |
|               |         | ENSE00000820317  | NRCAM     | exon (l)    |                             |                   |                   |       |        |
| SNP_A-1884431 | A/G     | ENSE000001001657 | DNAJC15   | exon (l)    | V_NFAT1_Q6 (NFAT1)          | 1764              | 65                | 1699  | 1764   |
| SNP_A-8552261 | A/G     | ENSE000001380455 | UNC79     | exon (l)    | V_NFAT1_Q6 (NFAT1)          | 1764              | 65                | 1699  | 1764   |
| SNP_A-8613122 | A/C     | ENSG00000149972  | CNTN5     | gene (h)    | V_NFAT1_Q6 (NFAT1)          | 1764              | 9                 | 1756  | 1764   |

**Supplementary table 5: Top functions of IPA analysis in the SNP genotype correlated genes.**

| Group        | IPA function                           | Number of genes |
|--------------|----------------------------------------|-----------------|
| Gene         | Cellular assembly and organization     | 4               |
|              | Cell death                             | 4               |
|              | Cell-to-Cell Signaling and Interaction | 5               |
| Gene (hESC)  | Cell signaling                         | 3               |
|              | Carbohydrate metabolism                | 8               |
|              | Cell cycle                             | 7               |
|              | Cellular development                   | 8               |
|              | Molecular transport                    | 7               |
| Transcript   | Cellular function and maintenance      | 3               |
| Exon (short) | Cellular development                   | 6               |
|              | Cellular growth and proliferation      | 7               |
|              | Cellular movement                      | 6               |
|              | Cell-to-Cell Signaling and Interaction | 6               |
|              | Cell cycle                             | 4               |
| Exon (long)  | Cell morphology                        | 23              |
|              | Cellular assembly and organization     | 28              |
|              | Cellular movement                      | 24              |
|              | Cell cycle                             | 7               |
|              | Cellular growth and proliferation      | 25              |

**Supplementary table 6: Top networks of IPA analysis in the SNP genotype correlated genes. The genes that are associated with SNPs in the analysis are bolded.**

| Group       | Top functions of network                                                                                         | Molecules of network                                                                                                                                                                                                                                                                                       | # mol |
|-------------|------------------------------------------------------------------------------------------------------------------|------------------------------------------------------------------------------------------------------------------------------------------------------------------------------------------------------------------------------------------------------------------------------------------------------------|-------|
| Exon long   | Cellular Movement<br>Endocrine System Disorders,<br>Immunological Disease                                        | Actin,Alpha Actinin, <b>ARHGAP22,ARPC2</b> ,Cadherin, <b>CDH13,CDH18,DLC1,DOT1L,ERK1/2</b> , F Actin,FSH,G protein beta gamma, <b>GATA4,hCG,HIPK3,Histone h3,KCNJ3,KDM4C,LPP,MBD1,NRXN1,PALLD,PLCB1,Pld,PRKCB,PTPRM,RALGDS,Ras homolog,RASGRP3,SORBS2,SSH1,STK17A,TTN,WDR1</b>                             | 24    |
|             | Connective Tissue Disorders,<br>Genetic Disorder,<br>Dermatological Diseases<br>and Conditions                   | Alp, <b>ANKH,CDKN2B,COL13A1,COL18A1,COL21A1,COL25A1,COL5A1,COL6A5</b> ,collagen, Collagen type I,Collagen type IV,Collagen(s), <b>CUX1</b> ,Cyclin A,Cyclin D,Cyclin E, <b>ESRRG,FBLN2,FGF2,HDAC9,HISTONE,IGFBP7,ITGA1,LAMA1,LAMB1,Laminin,Laminin1,MEF2,NFkB (complex),NID1,PDGF BB,SLBP,Tgf beta,TNC</b> | 20    |
|             | Gene Expression,<br>Infection Mechanism,<br>Cancer                                                               | AR,beta-estradiol,C11orf10,C9orf5,CHCHD8,CPA2, <b>CPS1,DENND5A,ELMOD1,FAM53C,FOS,GINS3,HNF4A,LDB2,MLH1,NGFR,NR2C1,NR3C1,NRD1,PHLDB2,POLR3E,PSD3,RAE1,RBM6,RCL1,SLC38A1,TFB1M,TLN2,TMEM87B,TNFSF11,TRIM37,TTC38,USP30,WDR59,YWHAZ</b>                                                                       | 16    |
|             | Endocrine System Disorders,<br>Genetic Disorder,<br>Metabolic Disease                                            | AJAP1, <b>APBB2,ARHGAP24,ARPC5L,ARRB2,ATP2C1,BCL9L,C1QTNF3,CA4,Ca2+,CDH8,CNTN3,CTNNA1,DLG4,DQX1,FAM40A,FBN2,FOXP1,FRAS1,HRAS,HTT,KCNAB1,KLF16,L3MBTL3,PCCA,PTPRG,QPCT,RCN1,RGL1,RSF1,SCYL2,SFXN3,SLC24A2,TBR1,trimethylamine</b>                                                                           | 16    |
|             | Cancer, Cardiovascular<br>System Development and<br>Function, Hematological<br>Disease                           | ADRA1D,ANGPTL2, <b>ANKS1B</b> ,beta-estradiol, <b>BICD1,CCDC141,CRNKL1,DISC1,DOK6,ERBB2,ETFB,FEZ2,FMN1,FNBP1,FRMD4A,GPR64,GPR88,GPR139,GPR173,GPR137B,HSD17B12,KIAA1409,PRR15L,PXDN,RCL1,RPL17,SNTG2,SPAG1,SPOCK2,SYNM,TRAF3IP1,VEGFA,YWHAQ,ZNF197,ZNF398</b>                                              | 14    |
|             | Cell Cycle,<br>Gene Expression,<br>Cancer                                                                        | <b>AEBP2,ARHGEF10,ARHGEF17,ARSB,AUTS2,CDKN2A,CECR1,CLEC2A,CPA4,DEFA4,HHAT,IFNG,LGMN,MAN2A1,MAN2B1,MDN1,MEIS2,MORC2,Myb,MYC,NAV2,OMG,PLEKHB1,RARRES1,RBBP7,RHOA,Rpl9</b> (includes others),RT1-B,SCPEP1,tretinoin, <b>TRIP12,VSIG4,Wnt,WNT2B,WNT9A</b>                                                      | 12    |
|             | Gene Expression,<br>Cardiovascular System<br>Development and Function,<br>Cell Morphology                        | 14-3-3, <b>ACACA</b> ,Akt, <b>ATP8A2,ATXN1,BMP6,C1orf182,Ck2,CNGB1,DAB1,Dnajb1-Hsp70,ERK,Focal adhesion kinase,FRMD4B,Hsp70,HSPA7,HSPA14,HSPA12A,Insulin,Jnk,MAGI1,Mapk,NRCAM,P38 MAPK,PGLYRP1,PI3K (complex),Pkc(s),PLC gamma,PPFIBP1,Ras,SRC,TIAM1,TRIP1,Vegf,Vegfr dimer</b>                            | 12    |
|             | Cell Cycle, Respiratory<br>System Development and<br>Function, Carbohydrate<br>Metabolism                        | AASS,ALDH5A1,Anti-inflammatory Cytokine, <b>ARNTL2,C9orf3,CAK,CCL23,CCND1,CFI,CHST2,CHST3,CUL7,CUL9,DLG2,FASLG,FNDC3B,GSS,IFT74,IL13,IL17RB,MPP4,MYOF,NDST1,NFIB,ONECUT1,PDGF-CC,PI4K2B,PLXNC1,PMPEA1,RBX1,TAPT1,TDO2,TGFB1,UST,WNT5B</b>                                                                  | 11    |
|             | Cell-To-Cell Signaling and<br>Interaction, Cardiovascular<br>System Development and<br>Function, Cell Morphology | ATP,CDC42, <b>CRIM1,DNAJB3,DNAJB13,DNAJC2,DNAJC12,DNAJC15,DNAJC16,DNAJC18,DNAJC22,DNAJC24,DNAJC25,DNAJC27,DNAJC28,DNAJC30,DNAJC35,DNAJC5G,EMID2,FANCC,FMNL2,HSP,HSPA7,HSPA12A,HSPA12B,HSPB11,MYCN,MYO1E,NUAK1,POLR1A,TBC1D9,TBP,TNF,VASH1,WDR62</b>                                                        | 10    |
| Exon short  | Cancer, Cardiovascular<br>System Development and<br>Function, Tissue Development                                 | Actin,ANTXR2, <b>ATXN1,BCAM,CAP2,CPA4,DOCK3,ESR1,FBLN2,FGF2,FOLH1,FSH,GAL3ST1,GATA4,GSTZ1,ITGB4,ITGB8,LAMA1,LAMB1,Laminin,Laminin2,LRG1,LYPD3,MYO16,NRXN1,PPP6R2,Rac/Cdc42,REG3A,SERPINF,SERPINF2,SSH1,STK17A,TINAG,TLR7,ZNF398</b>                                                                        | 11    |
|             | Cell Cycle, Cellular<br>Development, Cellular<br>Growth and Proliferation                                        | Acot5,AQP8,BUD31,C1QB, <b>C9orf3,Ca2+,CDHR1,CDKN2B,CPS1,FMN1,FNBP1,GIN1,HNF4A,JUN,KCNG1,KCNJ3,LPCAT3,mir-143,MRTO4,NOC3L,NRCAM,NUAK1,PPARA,PXDN,RAB18,SBNO2,SHISA5,SKI,SLC24A2,SLC35A1,SLC35A5,SLC39A1,TFB1M,TGFB1,TTC22</b>                                                                               | 10    |
|             | Cellular Movement, Cellular<br>Development, Hematological<br>System Development and<br>Function                  | <b>AEBP2,AIF1,ARPC5L,ARRB2,BAZI1,beta-estradiol,BICD1,BOPI,LOC727967,CDC42EP4,CDH13,CTPS,GSK3B,IL20,KCNAB1,KCND3,LDB2,LIMA1,MEIS2,NIN,NOP56,NPY1R,PAK7,PES1,PRUNE,RCL1,RPS13,SGK3,SLC11A2,SLC20A1,SSTR3,STC2,TNFSF8,TNFSF11,TRHR,TSPAN5</b>                                                                | 7     |
| Transcript  | Organ Morphology,<br>Organismal Development,<br>Reproductive System<br>Development and Function                  | 3-beta,17-beta-androstane-3,20-dione,ABHD5,AR,beta-estradiol,Ca2+,COMP, <b>DENND5A,DLG4,DSCAM,EDN1,FMOD,FOLH1,HUNK,KCN2,MED12L,MEIS2,MPP1,NFRKB,NLGN3,NLGN4X,NRXN1,NXPH1,PITPNM2,POU3F3,Relaxin,S100A2,S100A13,SDK1,SLC24A2,SLC24A3,SLC6A9,SRD5A1,SSTR4,SYTL3,ZMIZ1</b>                                    | 5     |
| Gene        | Gene Expression,<br>Cancer, Developmental<br>Disorder                                                            | ABCA6,Actin,AKT1, <b>ANKH,ARSB</b> ,beta-estradiol,C11orf10,C14orf106,C9orf5, <b>CCDC25,CECR1,CHCHD8,CPA2,CWC25,GINS3,GIP2 (human),HAAO,HNF4A,IFNG,Igtp,KCNQ3,MEIS2,MSX1,NRXN1,PALLD,PAQR7,POLR3E,SH3BGRL2,SRC,SSR2,TMEM43,TMEM87A,TP53,TPRKB,WDFY2</b>                                                    | 10    |
|             | Molecular Transport,<br>Cardiovascular System<br>Development and Function,<br>Cell Morphology                    | ADAM12,alpha-estradiol,ANXA6,AR,BMX,Ca2+,COMP,Cyclooxygenase, <b>DENND5A,EDN1,Endothelin,F9,Filamin,GDI1,Girk,K Channel,KCNJ2,MARCKSL1,MME,MXD1,N-acetylglucosamine,Na+,PHLDB2,phosphatidylinositol-3,4,5-triphosphate,PIK3CD,PKN1,PLN,RHO,SCNN1B,SCNN1G,SERPINB2,SLC24A2,SNX1,sodium,VSNL1</b>            | 4     |
| Gene (hESC) | Cardiovascular System<br>Development and<br>Function, Embryonic<br>Development, Organismal<br>Development        | <b>ADAM19,Akt,APOA1,ARRB1,CD34,Cyclin A,EIF2AK4,ERK,ERK1/2,FGF5,FMO1,GHR,Gpcr,GPR174,GPR89A/GPR89B,GPR89C,Histone h3,ITGA9,Jnk,LGR5,Mapk,NFkB (complex),NRG1,P2RY6,PDGF BB,PI3K (complex),PIK3R1,PREX1,PTPRB,Rac,SHANK2,SOX6,STK10,TAAR8,VN1R3</b>                                                         | 18    |
|             | Protein Synthesis,<br>Cell Cycle,<br>Gene Expression                                                             | 2' 5' oas,5430435G22Rik,APLP1, <b>ASB3,BPI,Ca2+,CDS2,CLEC10A,CNTN4,CNTN5,COX6A1,CPEB1,EGFLAM,Gbp1,GBP4,Irf15,IFNB1,IL6,KIAA0101,KIAA1524,LARGE,LRRN1,MX,MYC,NFYB,PITPNM3,PPP1CC,PPP1R7,prostaglandin F2alpha,RPL19,RPL27,RPL41,S100A9,SLCO2A1,VTCN1</b>                                                    | 10    |
|             | Skeletal and Muscular<br>System Development<br>and Function, Renal<br>and Urological<br>Disease, Cell Death      | ACSM3,ANKH,ASPN, <b>ATP2C2</b> ,beta-estradiol,BMP2,BMP8B,C8orf4,Cathepsin,Clec2d (includes others), <b>CLSTN2,CNN2,CPXM1,DIP2A,DNM3,FASLG,FMO2,FMO5,FMOD,FXD5,FYN,GNS,HSD17B6,KCNJ16,KDELR,KDELR3,KLK11,MFI2,PDZK1IP1,Pka,RERG,SH3RF2,SLC13A3,TGFB1,XYLTI1</b>                                            | 9     |
